# Supplementary material for: A systematic review on ethical challenges of ‘field’ research in low-income and middle-income countries: respect, justice and beneficence for research staff?
Source: PubMed Central journal article supplement — BMJ Glob Health. 2021 Jul 15;6(7):e005380. doi: 10.1136/bmjgh-2021-005380 (PMC8292801; doi:10.1136/bmjgh-2021-005380), 2021-07-15
Supplement: bmjgh-2021-005380supp001.pdf [file bmjgh-2021-005380supp001.pdf]

## Supplementary Files

Table S1. Search Strategy

|    |                                                                                                                                                                                                                                                                                                                                                                                                                                                                                                                                                                                                                                                                                                                                                                                                                                                                                                                                                                                                                                                                                                                                                                                                                                                                                                                                                                                                                                                         |
|----|---------------------------------------------------------------------------------------------------------------------------------------------------------------------------------------------------------------------------------------------------------------------------------------------------------------------------------------------------------------------------------------------------------------------------------------------------------------------------------------------------------------------------------------------------------------------------------------------------------------------------------------------------------------------------------------------------------------------------------------------------------------------------------------------------------------------------------------------------------------------------------------------------------------------------------------------------------------------------------------------------------------------------------------------------------------------------------------------------------------------------------------------------------------------------------------------------------------------------------------------------------------------------------------------------------------------------------------------------------------------------------------------------------------------------------------------------------|
| #1 | TS=(Ethics OR Ethical OR "Ethic* Guideline*" OR "Ethic* Standard*" OR "Ethic* Principle*" OR "Ethic* Code of Conduct" OR "Ethic* Safeguard*" OR "Ethic* Procedures" OR Beneficence OR "Do* no Harm")                                                                                                                                                                                                                                                                                                                                                                                                                                                                                                                                                                                                                                                                                                                                                                                                                                                                                                                                                                                                                                                                                                                                                                                                                                                    |
| #2 | TS=(Depression OR "Mental Health" OR Trauma* OR Stress OR "PostTraumatic Stress Disorder" OR PTSD OR Burnout OR "Compassion Fatigue" OR Guilt OR "Vicarious Trauma" OR "Secondary Trauma" OR Security OR Safety OR Crime OR Criminality OR Protection OR "Physical Integrity" OR Harassment OR Racism OR Racist OR Xenophobia OR Xenophobic OR Misconduct OR War OR Warzone OR "Post Conflict" OR "Post-conflict" OR "Fragile State" OR "Fragile Setting" OR Violence OR Racism OR "Power Dynamics" OR "Power Balance" OR "Power Imbalance" OR Hierarchy OR "Gender Bias" OR Discrimination OR "Work* NEAR/2 Condition*" OR Exploitation OR "Informal Employment" OR "Job Security" OR "Social Security" OR "Health Risk" OR Insurance OR "Pay* Scale" OR "Pay* Level" OR Salary OR Wage OR "Work* NEAR/2 Contract" OR "Post Colonial*" OR "Post-colonial*" OR Colonialisation OR Colonialization OR Author* OR Co-Author* OR Acknowledgement* OR "Parachute Research")                                                                                                                                                                                                                                                                                                                                                                                                                                                                                 |
| #3 | TS=(Researcher OR "Research Staff" OR Enumerator OR Interview* OR Survey OR "Research Assistant" OR "Data Collector" OR "Research NEAR/2 Manager" OR "Field Manager" OR "Field Staff" OR "Implementing Staff" OR "Implementing Actor*" OR "Implementing Agent*" OR "Research Staff" OR "Research Team" OR "Research Consultant*" OR "Field Research" OR "Field Project" OR Fieldwork OR "Data Collection" OR "Impact Evaluation*" OR "Field Experiment" OR "Randomized Control* Trial" OR "Randomised Control* Trial" OR "Controlled Clinical Trial" OR Randomised OR Randomized OR RCT OR Lab-In-Field OR "Lab In Field" OR Experiment* OR "Research Implementation" OR "Development Project" OR "Development Intervention")                                                                                                                                                                                                                                                                                                                                                                                                                                                                                                                                                                                                                                                                                                                           |
| #4 | TS=(Africa OR Asia OR Caribbean OR "West Indies" OR "South America" OR "Latin America" OR "Central America" OR Afghanistan OR Albania OR Algeria OR Angola OR Antigua OR Barbuda OR Armenia OR Armenian OR Aruba OR Azerbaijan OR Bahrain OR Bangladesh OR Barbados OR Benin OR Byelarus OR Byelorussian OR Belarus OR Belorussian OR Belorussia OR Belize OR Bhutan OR Bolivia OR Bosnia OR Herzegovina OR Hercegovina OR Botswana OR Brasil OR Brazil OR Bulgaria OR "Burkina Faso" OR "Burkina Fasso" OR "Upper Volta" OR Burundi OR Urundi OR Cambodia OR "Khmer Republic" OR Kampuchea OR Cameroon OR Camerons OR Cameron OR Camerons OR "Cape Verde" OR "Central African Republic" OR Chad OR Chile OR China OR Colombia OR Comoros OR "Comoro Islands" OR Comores OR Mayotte OR Congo OR Zaire OR "Costa Rica" OR "Cote dIvoire" OR "Cote d*" OR "Cote *Ivoire" OR "Ivory Coast" OR Croatia OR Cuba OR Cyprus OR Czechoslovakia OR "Czech Republic" OR Slovakia OR "Slovak Republic" OR Djibouti OR "French Somaliland" OR Dominica OR "Dominican Republic" OR "East Timor" OR "East Timur" OR "Timor Leste" OR Ecuador OR Egypt OR "United Arab Republic" OR "El Salvador" OR Eritrea OR Estonia OR Ethiopia OR Fiji OR 7,781,214 Gabon OR "Gabonese Republic" OR Gambia OR Gaza OR Georgia OR Georgian OR Ghana OR "Gold Coast" OR "Cote dOre" OR "Cote *Ore" OR Greece OR Grenada OR Guatemala OR Guinea OR Guam OR Guiana OR Guyana OR Haiti |

|    |                                                                                                                                                                                                                                                                                                                                                                                                                                                                                                                                                                                                                                                                                                                                                                                                                                                                                                                                                                                                                                                                                                                                                                                                                                                                                                                                                                                                                                                                                                                                                                                                                                                                                                                                                                                                                                                                                                                                                                                                                                                                                                                                                                                                                                                                                                                                                                                                                                                                                                                                                                                                                   |
|----|-------------------------------------------------------------------------------------------------------------------------------------------------------------------------------------------------------------------------------------------------------------------------------------------------------------------------------------------------------------------------------------------------------------------------------------------------------------------------------------------------------------------------------------------------------------------------------------------------------------------------------------------------------------------------------------------------------------------------------------------------------------------------------------------------------------------------------------------------------------------------------------------------------------------------------------------------------------------------------------------------------------------------------------------------------------------------------------------------------------------------------------------------------------------------------------------------------------------------------------------------------------------------------------------------------------------------------------------------------------------------------------------------------------------------------------------------------------------------------------------------------------------------------------------------------------------------------------------------------------------------------------------------------------------------------------------------------------------------------------------------------------------------------------------------------------------------------------------------------------------------------------------------------------------------------------------------------------------------------------------------------------------------------------------------------------------------------------------------------------------------------------------------------------------------------------------------------------------------------------------------------------------------------------------------------------------------------------------------------------------------------------------------------------------------------------------------------------------------------------------------------------------------------------------------------------------------------------------------------------------|
|    | <p>OR Honduras OR India OR Maldives OR Indonesia OR Iran OR Iraq OR "Isle of Man" OR Jamaica OR Jordan OR Kazakhstan OR Kazakh OR Kenya OR Kiribati OR Korea OR Kosovo OR Kyrgyzstan OR Kirghizia OR "Kyrgyz Republic" OR Kirghiz OR Kirgizstan OR "Lao PDR" OR Laos OR Latvia OR Lebanon OR Lesotho OR Basutoland OR Liberia OR Libya OR Lithuania Macedonia OR Madagascar OR "Malagasy Republic" OR Malaysia OR Malaya OR Malay OR Sabah OR Sarawak OR Malawi OR Nyasaland OR Mali OR Malta OR "Marshall Islands" OR Mauritania OR Mauritius OR "Agalega Islands" OR Mexico OR Micronesia OR "Middle East" OR Moldova OR Moldavia OR Moldovan OR Mongolia OR Montenegro OR Morocco OR Ifni OR Mozambique OR Myanmar OR Myanma OR Burma OR Namibia OR Nepal OR "Netherlands Antilles" OR "New Caledonia" OR Nicaragua OR Niger OR Nigeria OR "Northern Mariana Islands" OR Oman OR Muscat OR Pakistan OR Palau OR Palestine OR Panama OR Paraguay OR Peru OR Philippines OR Philipines OR Phillipines OR Phillippines OR Poland OR Portugal OR "Puerto Rico" OR Romania OR Rumania OR Roumania OR Russia OR Russian OR Rwanda OR Ruanda OR "Saint Kitts" OR "St Kitts" OR Nevis OR "Saint Lucia" OR "St Lucia" OR "Saint Vincent" OR "St Vincent" OR Grenadines OR Samoa OR "Samoa Islands" OR "Navigator Island" OR "Navigator Islands" OR "Sao Tome" OR "Saudi Arabia" OR Senegal OR Serbia OR Montenegro OR "Sierra Leone" OR Slovenia OR "Sri Lanka" OR Ceylon OR "Solomon Islands" OR Somalia OR Sudan OR "South Sudan" OR Suriname OR Surinam OR Swaziland OR Eswatini OR Syria OR Tajikistan OR Tadjhikistan OR Tadjikistan OR Tadjhik OR Tanzania OR Thailand OR Togo OR "Togolese Republic" OR Tonga OR Trinidad OR Tobago OR Tunisia OR Turkey OR Turkmenistan OR Turkmen OR Uganda OR Ukraine OR Uruguay OR USSR OR "Soviet Union" OR "Union of Soviet Socialist Republics" OR Uzbekistan OR Uzbek OR Vanuatu OR "New Hebrides" OR Vietnam OR "Viet Nam" OR "West Bank" OR Yemen OR Yugoslavia OR Zambia OR Zimbabwe OR Rhodesia OR ((developing OR "less* developed" OR "under developed" OR underdeveloped OR "middle income" OR "low* income" OR underserved OR "under served" OR deprived OR poor*)) ADJ (countri* OR nation? OR population? OR world)) OR ((developing OR "less* developed" OR "under developed" OR underdeveloped OR "middle income" OR "low* income") ADJ (economy OR economies)) OR (low* ADJ (gdp OR gnp OR "gross domestic" OR "gross national")) OR (low ADJ3 middle ADJ3 countri*) OR (lmic OR lmics OR "third world" OR "lami countri*") OR "transitional countri*")</p> |
| #5 | #1 AND #2 AND #3 AND #4                                                                                                                                                                                                                                                                                                                                                                                                                                                                                                                                                                                                                                                                                                                                                                                                                                                                                                                                                                                                                                                                                                                                                                                                                                                                                                                                                                                                                                                                                                                                                                                                                                                                                                                                                                                                                                                                                                                                                                                                                                                                                                                                                                                                                                                                                                                                                                                                                                                                                                                                                                                           |
